# Supplementary material for: Antifungal Activity of Mexican Propolis on Clinical Isolates of Candida Species
Source: MDPI journal article supplement (doi:10.3390/molecules27175651), 2022-09-01
Supplement: s1 [file s1]

# SUPPLEMENTARY MATERIAL

## INDEX- Supplemental Material

|                                                                                                                                                                 |    |
|-----------------------------------------------------------------------------------------------------------------------------------------------------------------|----|
| <b>1. Spectral data</b> .....                                                                                                                                   | 2  |
| <b>Figure S1.</b> <sup>1</sup> H NMR spectrum of the methanol extract of propolis (700 MHz, DMSO-d <sub>6</sub> ).....                                          | 2  |
| <b>Figure S2.</b> <sup>1</sup> H NMR spectrum of F40 obtained from fractionation of the methanol extract of propolis (700 MHz, DMSO-d <sub>6</sub> ).....       | 3  |
| <b>Figure S3.</b> <sup>13</sup> C NMR spectrum of F40 obtained from fractionation of the methanol extract of propolis (150 MHz, DMSO-d <sub>6</sub> ).....      | 4  |
| <b>Figure S4.</b> <sup>1</sup> H NMR spectrum of F75 obtained from fractionation of the methanol extract of propolis (700 MHz, DMSO-d <sub>6</sub> ).....       | 5  |
| <b>Figure S5.</b> <sup>13</sup> C NMR spectrum of F75 obtained from fractionation of the methanol extract of propolis (150 MHz, DMSO-d <sub>6</sub> ).....      | 6  |
| <b>Figure S6.</b> <sup>1</sup> H NMR spectrum of F80 obtained from fractionation of the methanol extract of propolis (700 MHz, acetone-d <sub>6</sub> ).....    | 7  |
| <b>Figure S7.</b> <sup>13</sup> C NMR spectrum of F80 obtained from fractionation of the methanol extract of propolis (150 MHz, acetone-d <sub>6</sub> ).....   | 8  |
| <b>Figure S8.</b> <sup>1</sup> H NMR spectrum of F101 obtained from fractionation of the methanol extract of propolis (700 MHz, DMSO-d <sub>6</sub> ).....      | 9  |
| <b>Figure S9.</b> <sup>13</sup> C NMR spectrum of F101 obtained from fractionation of the methanol extract of propolis (150 MHz, DMSO-d <sub>6</sub> ).....     | 10 |
| <b>Figure S10.</b> <sup>1</sup> H NMR spectrum of F130 obtained from fractionation of the methanol extract of propolis (600 MHz, Acetone-d <sub>6</sub> ).....  | 11 |
| <b>Figure S11.</b> <sup>13</sup> C NMR spectrum of F130 obtained from fractionation of the methanol extract of propolis (150 MHz, Acetone-d <sub>6</sub> )..... | 12 |
| <b>Figure S12.</b> <sup>1</sup> H NMR spectrum of F160 obtained from fractionation of the methanol extract of propolis (600 MHz, Acetone-d <sub>6</sub> ).....  | 13 |
| <b>Figure S13.</b> <sup>13</sup> C NMR spectrum of F160 obtained from fractionation of the methanol extract of propolis (150 MHz, Acetone-d <sub>6</sub> )..... | 14 |
| <b>Figure S14.</b> HRMS (ESI-negative mode) spectra of the methanol extract of propolis.....                                                                    | 15 |
| <b>Figure S15.</b> HRMS (ESI-negative mode) spectra of F40.....                                                                                                 | 16 |
| <b>Figure S16.</b> HRMS (ESI-negative mode) spectra of F80.....                                                                                                 | 17 |
| <b>Figure S17.</b> HRMS (ESI-negative mode) spectra of F101.....                                                                                                | 18 |
| <b>Figure S18.</b> HRMS (ESI-negative mode) spectra of F130.....                                                                                                | 19 |
| <b>Figure S19.</b> HRMS (ESI-negative mode) spectra of F160.....                                                                                                | 20 |

## 1. Spectral Data

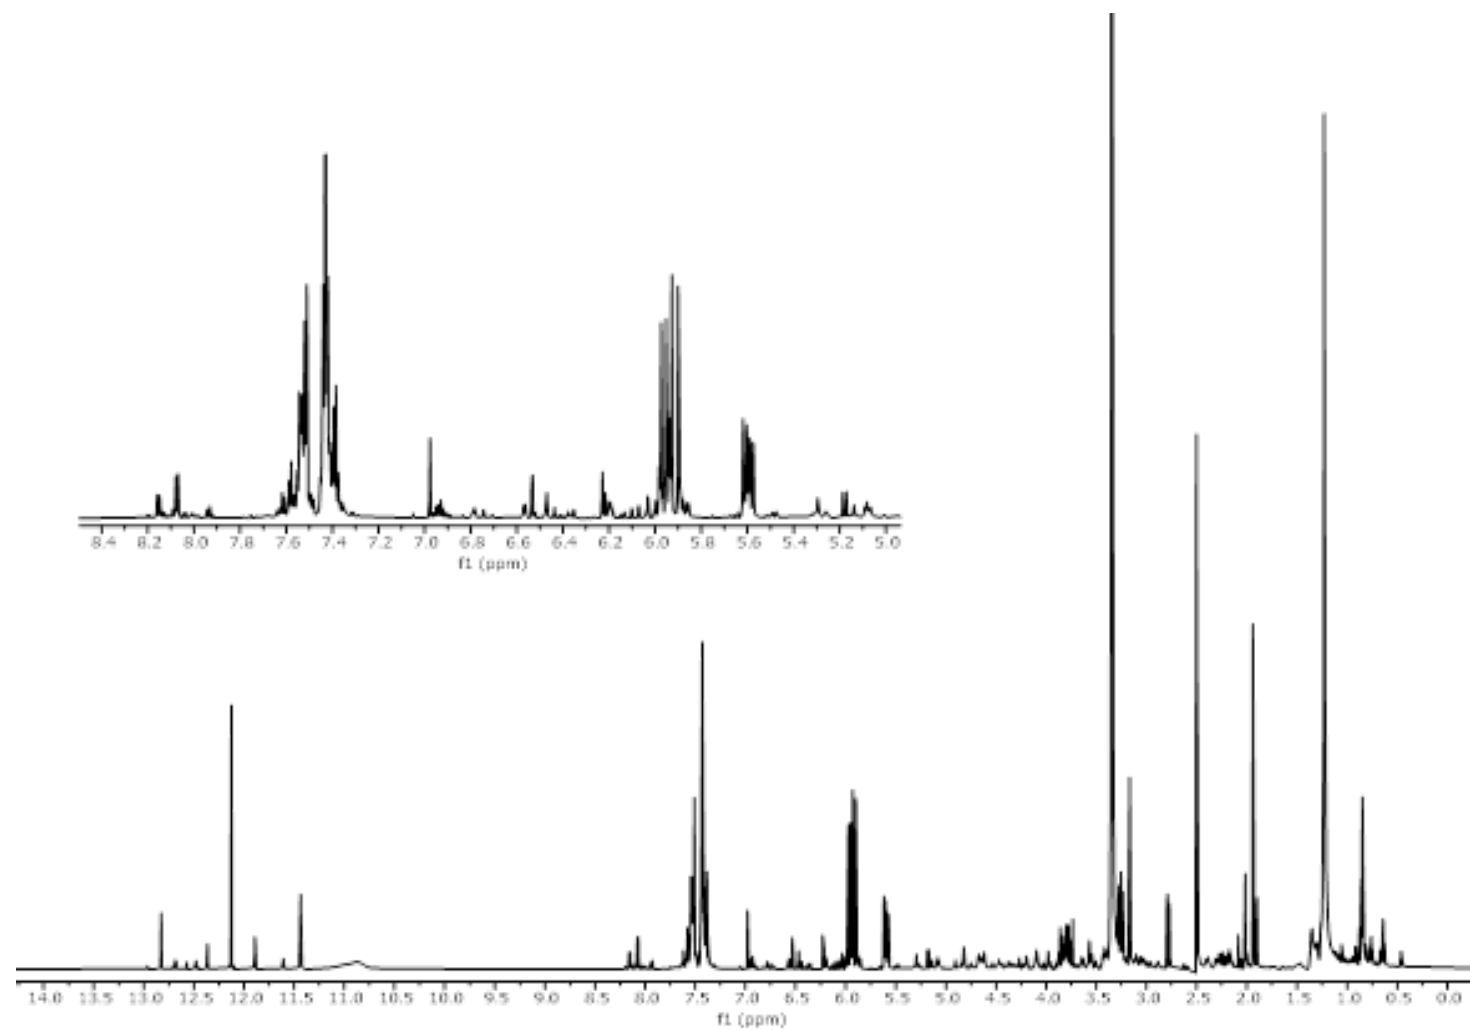

**Figure S1.**  $^1\text{H}$  NMR spectrum of the methanol extract of propolis (700 MHz,  $\text{DMSO-d}_6$ ).

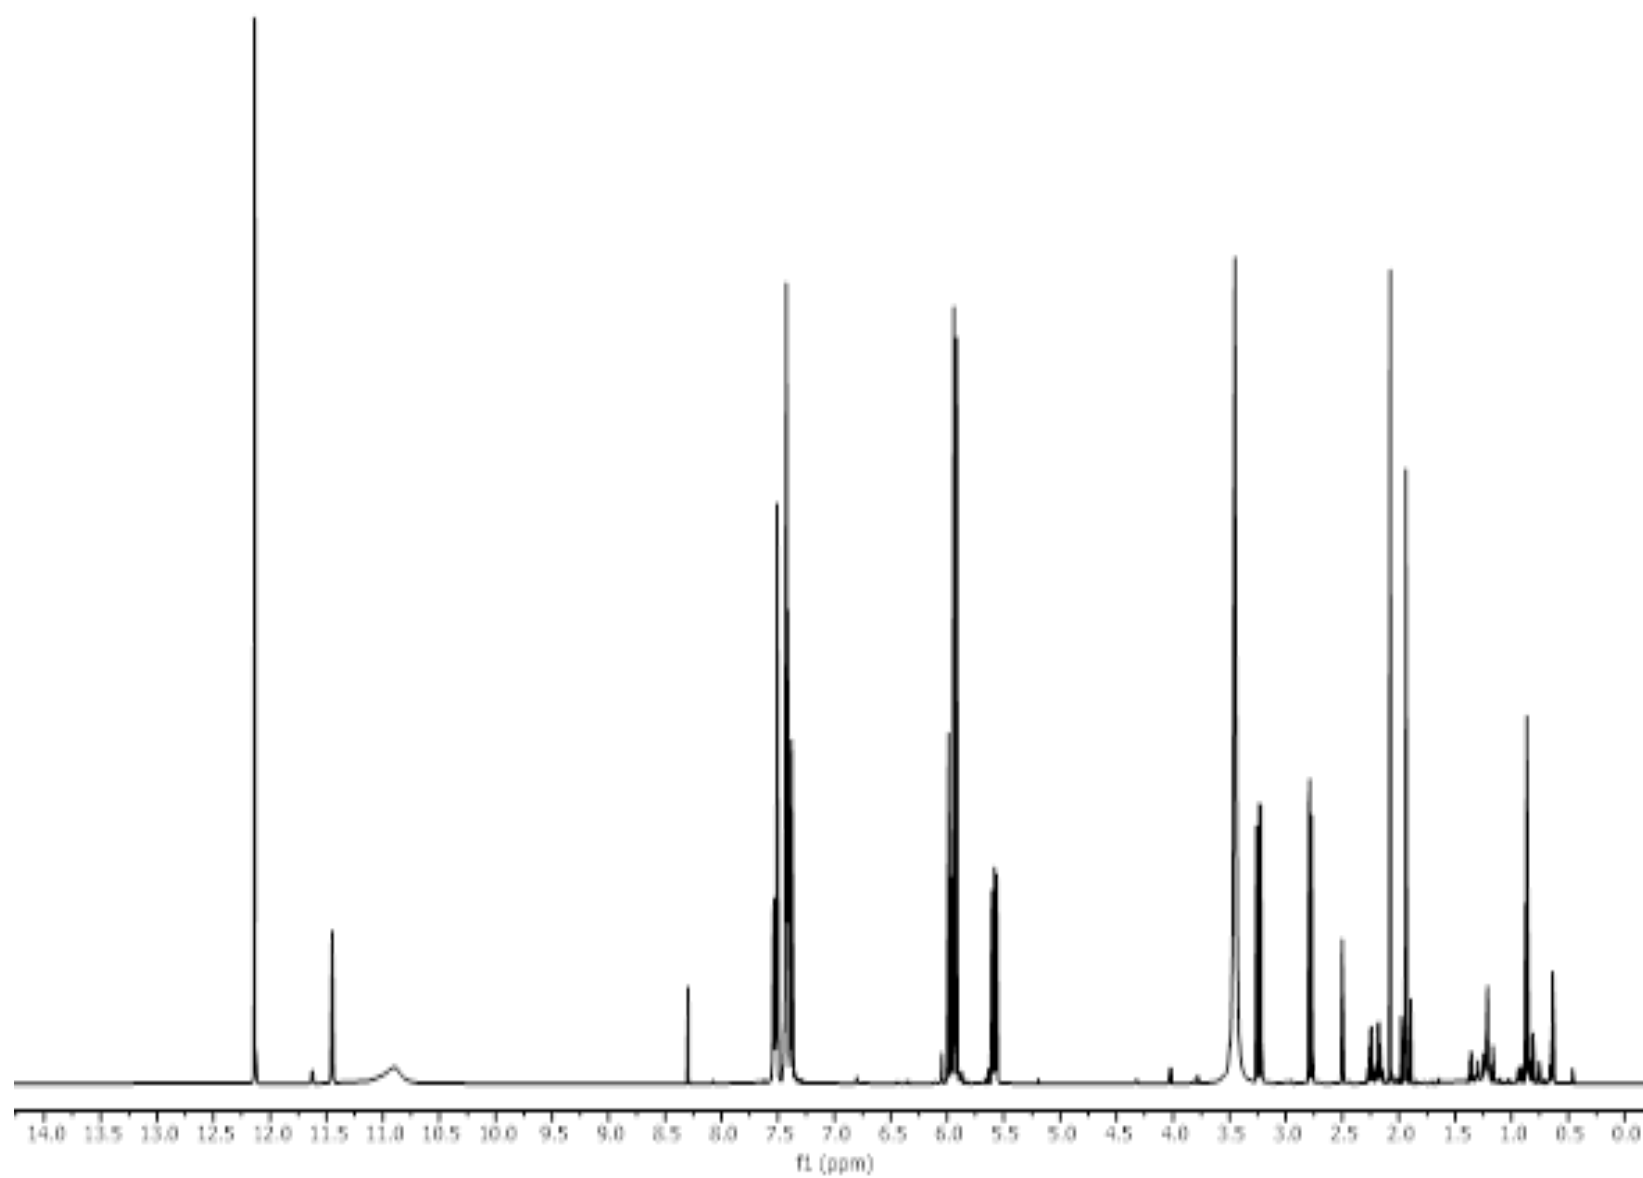

**Figure S2.**  $^1\text{H}$  NMR spectrum of F40 obtained from fractionation of the methanol extract of propolis (700 MHz, DMSO- $d_6$ ).

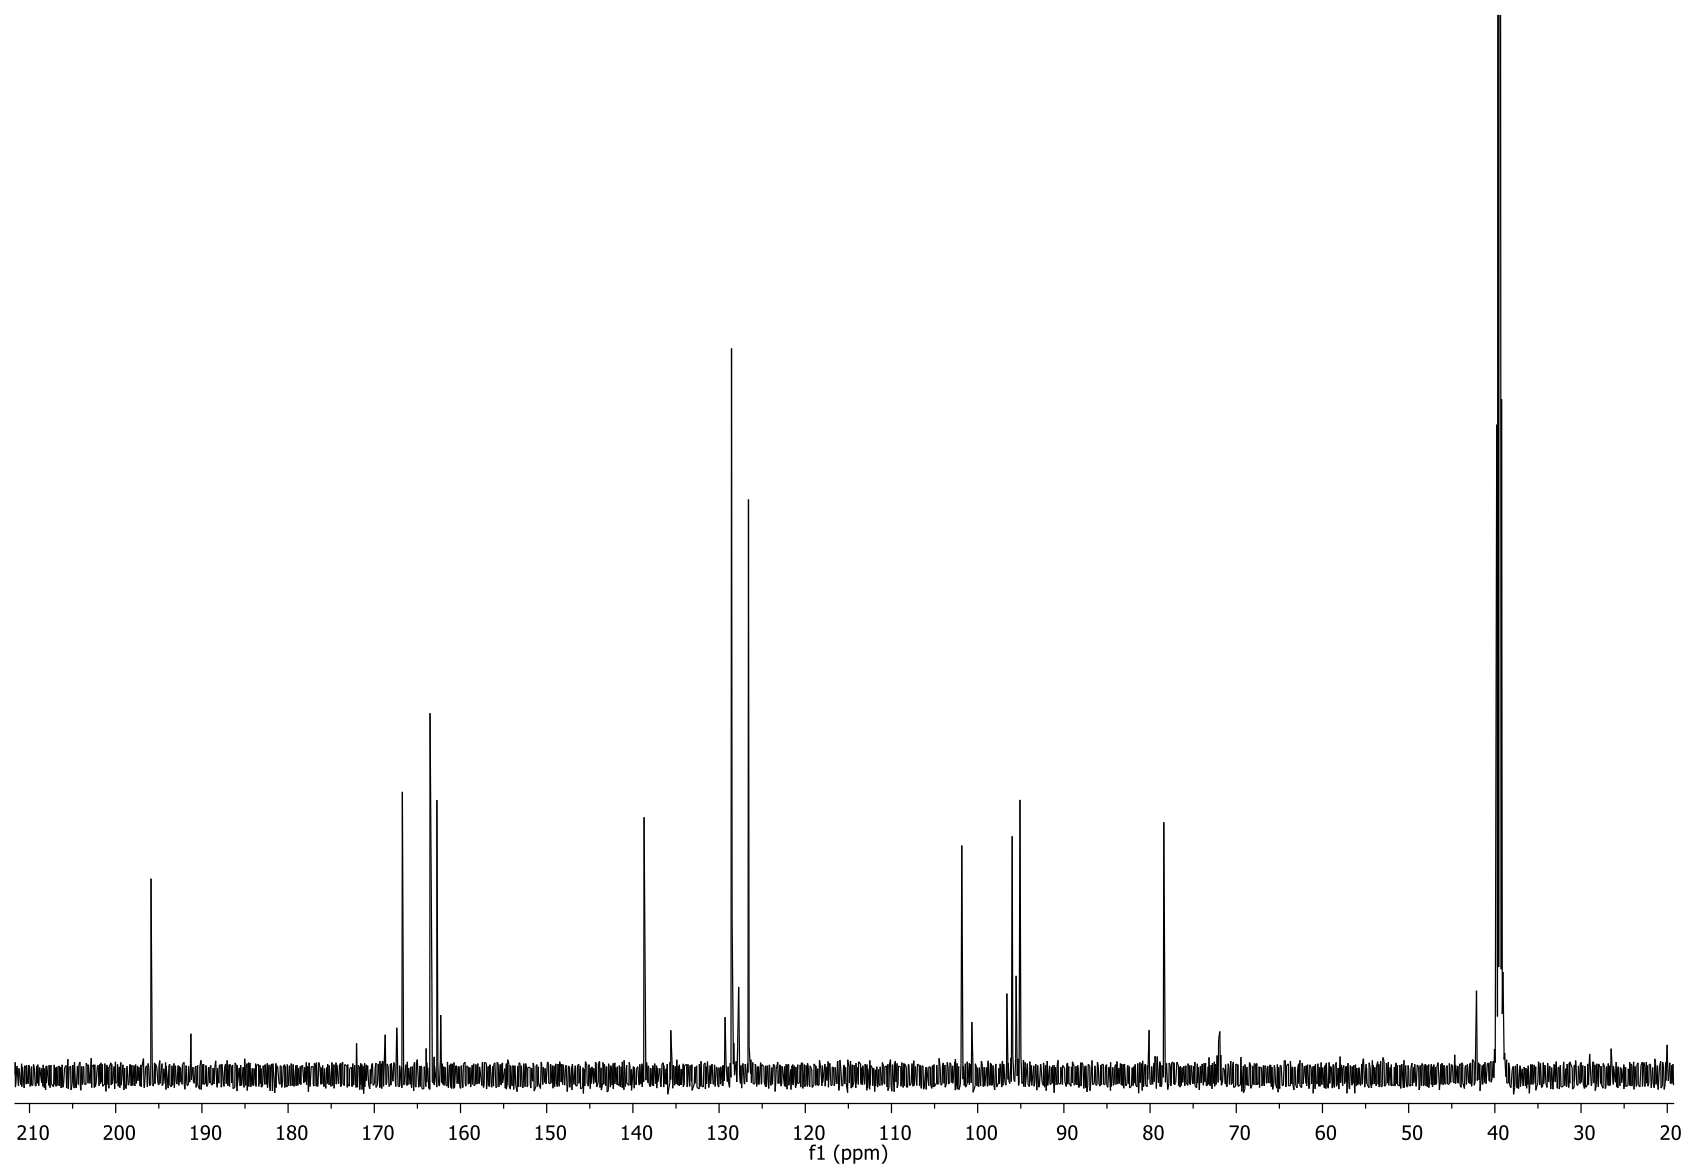

**Figure S3.**  $^{13}\text{C}$  NMR spectrum of F40 obtained from fractionation of the methanol extract of propolis (150 MHz, DMSO- $d_6$ ).

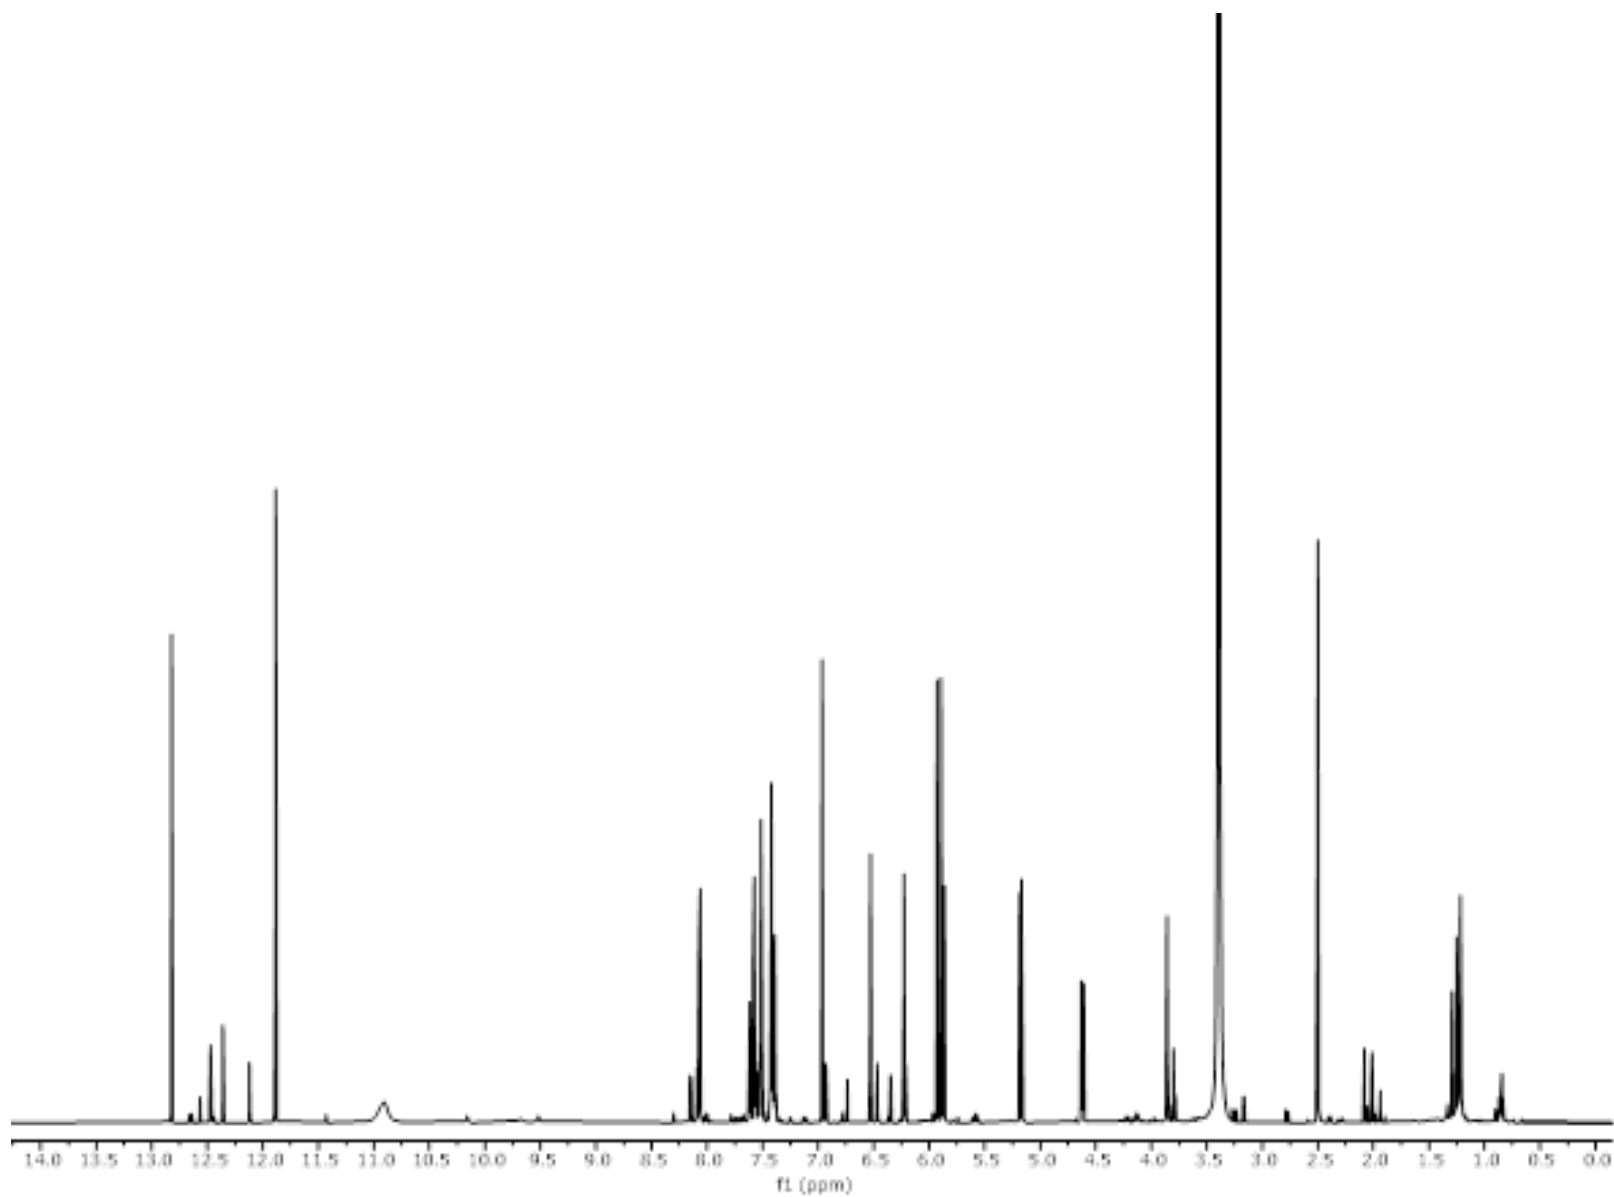

**Figure S4.**  $^1\text{H}$  NMR spectrum of F75 obtained from fractionation of the methanol extract of propolis (700 MHz, DMSO- $d_6$ ).

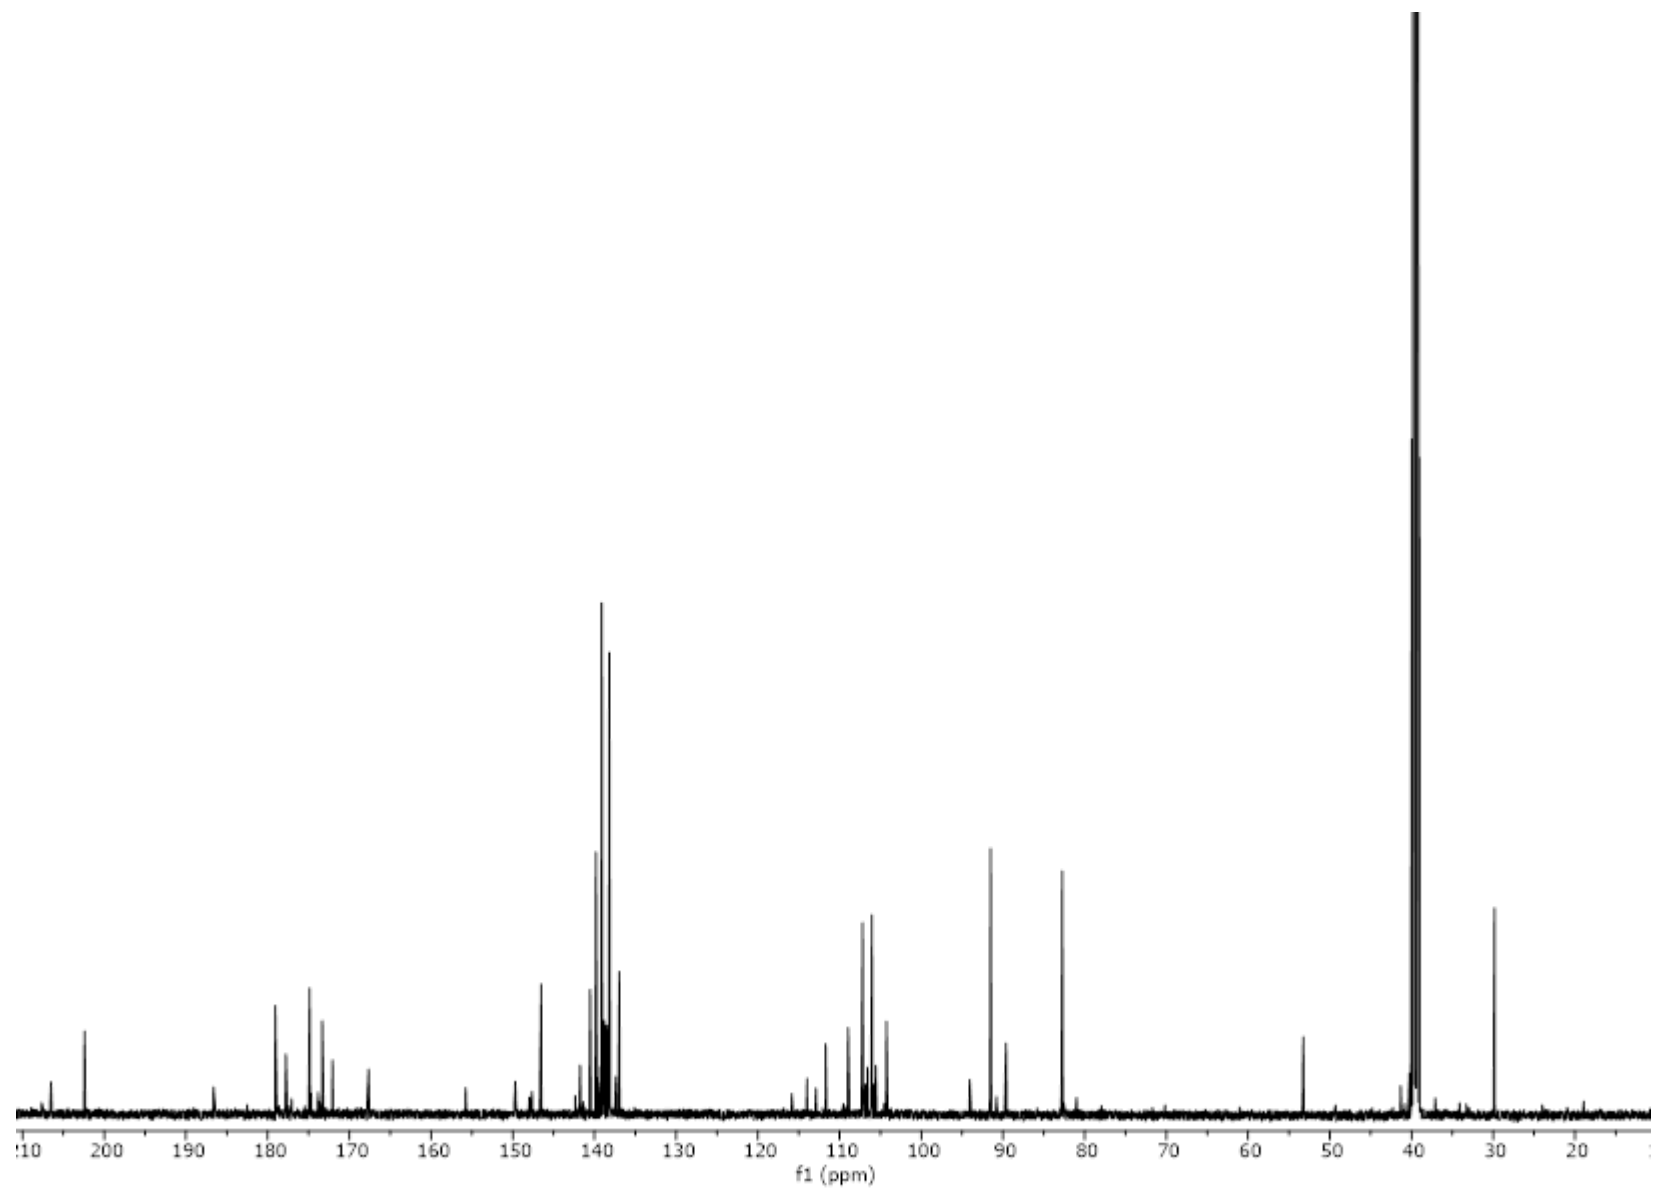

**Figure S5.**  $^{13}\text{C}$  NMR spectrum of F75 obtained from fractionation of the methanol extract of propolis (150 MHz, DMSO- $d_6$ ).

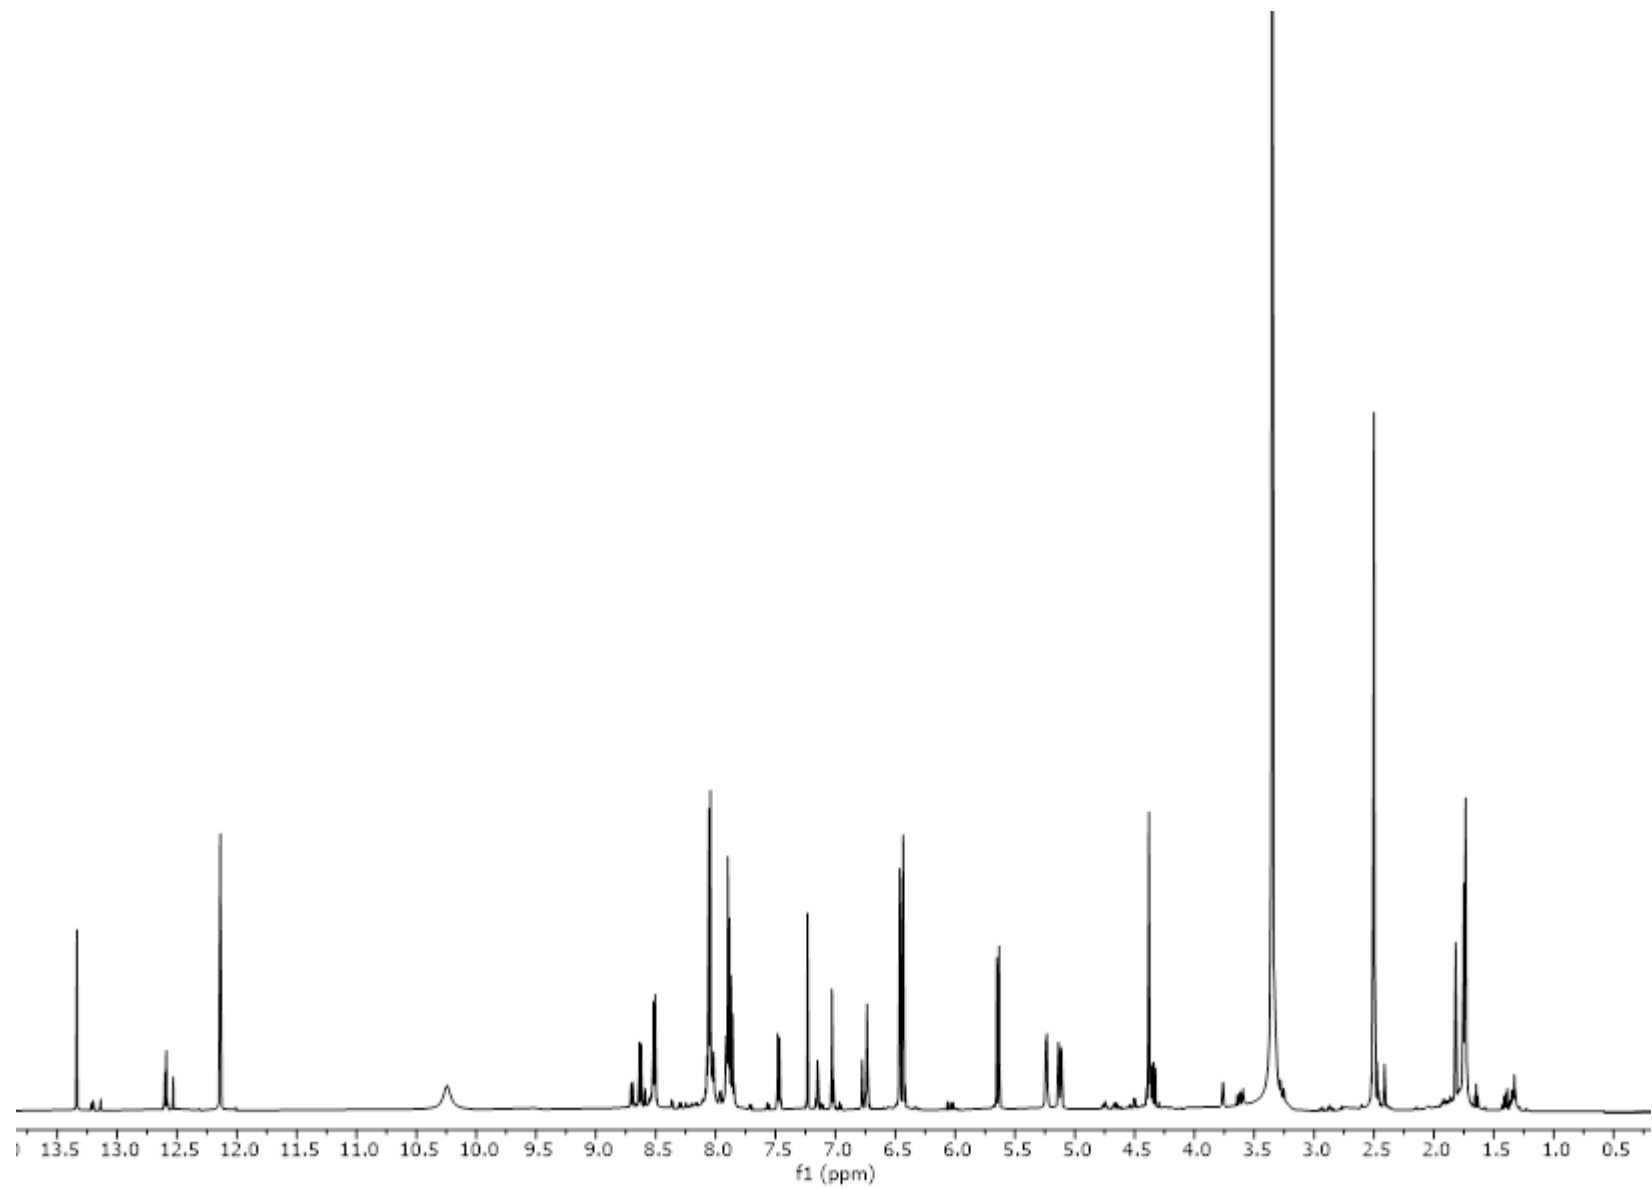

**Figure S6.**  $^1\text{H}$  NMR spectrum of F80 obtained from fractionation of the methanol extract of propolis (700 MHz, acetone- $\text{d}_6$ ).

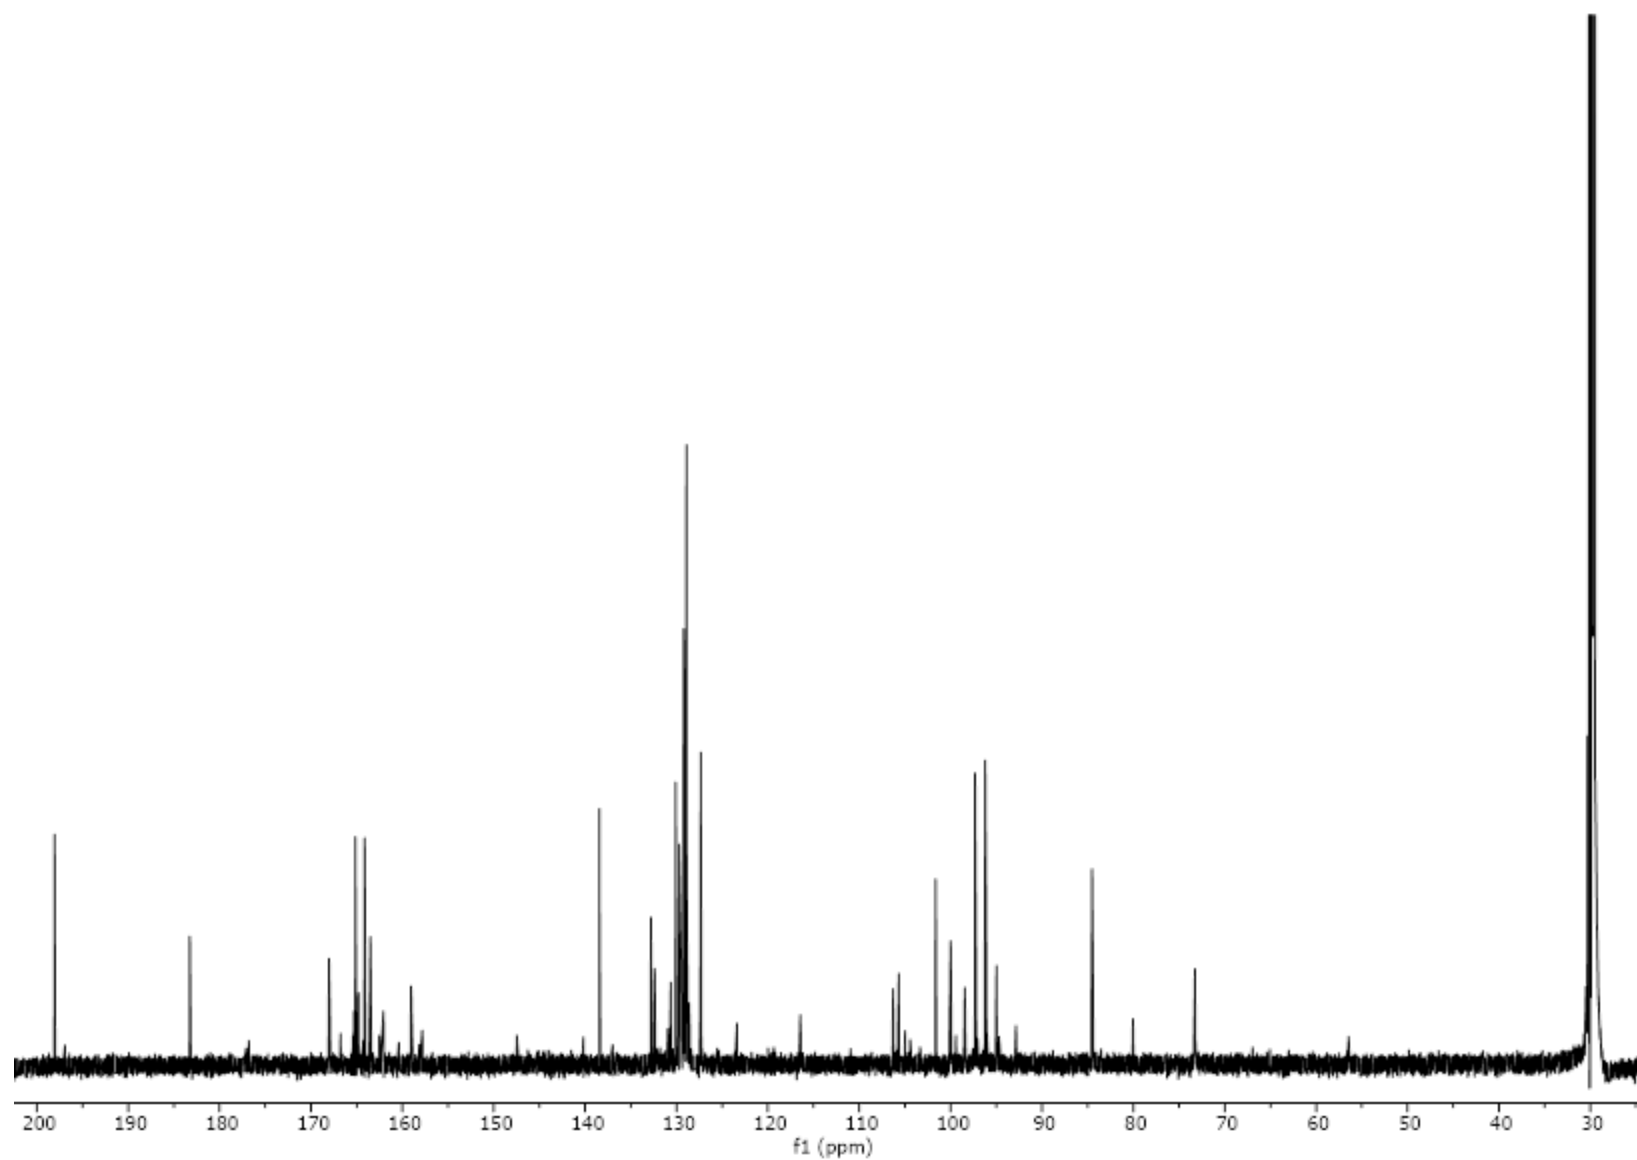

**Figure S7.**  $^{13}\text{C}$  NMR spectrum of F80 obtained from fractionation of the methanol extract of propolis (150 MHz, acetone- $\text{d}_6$ ).



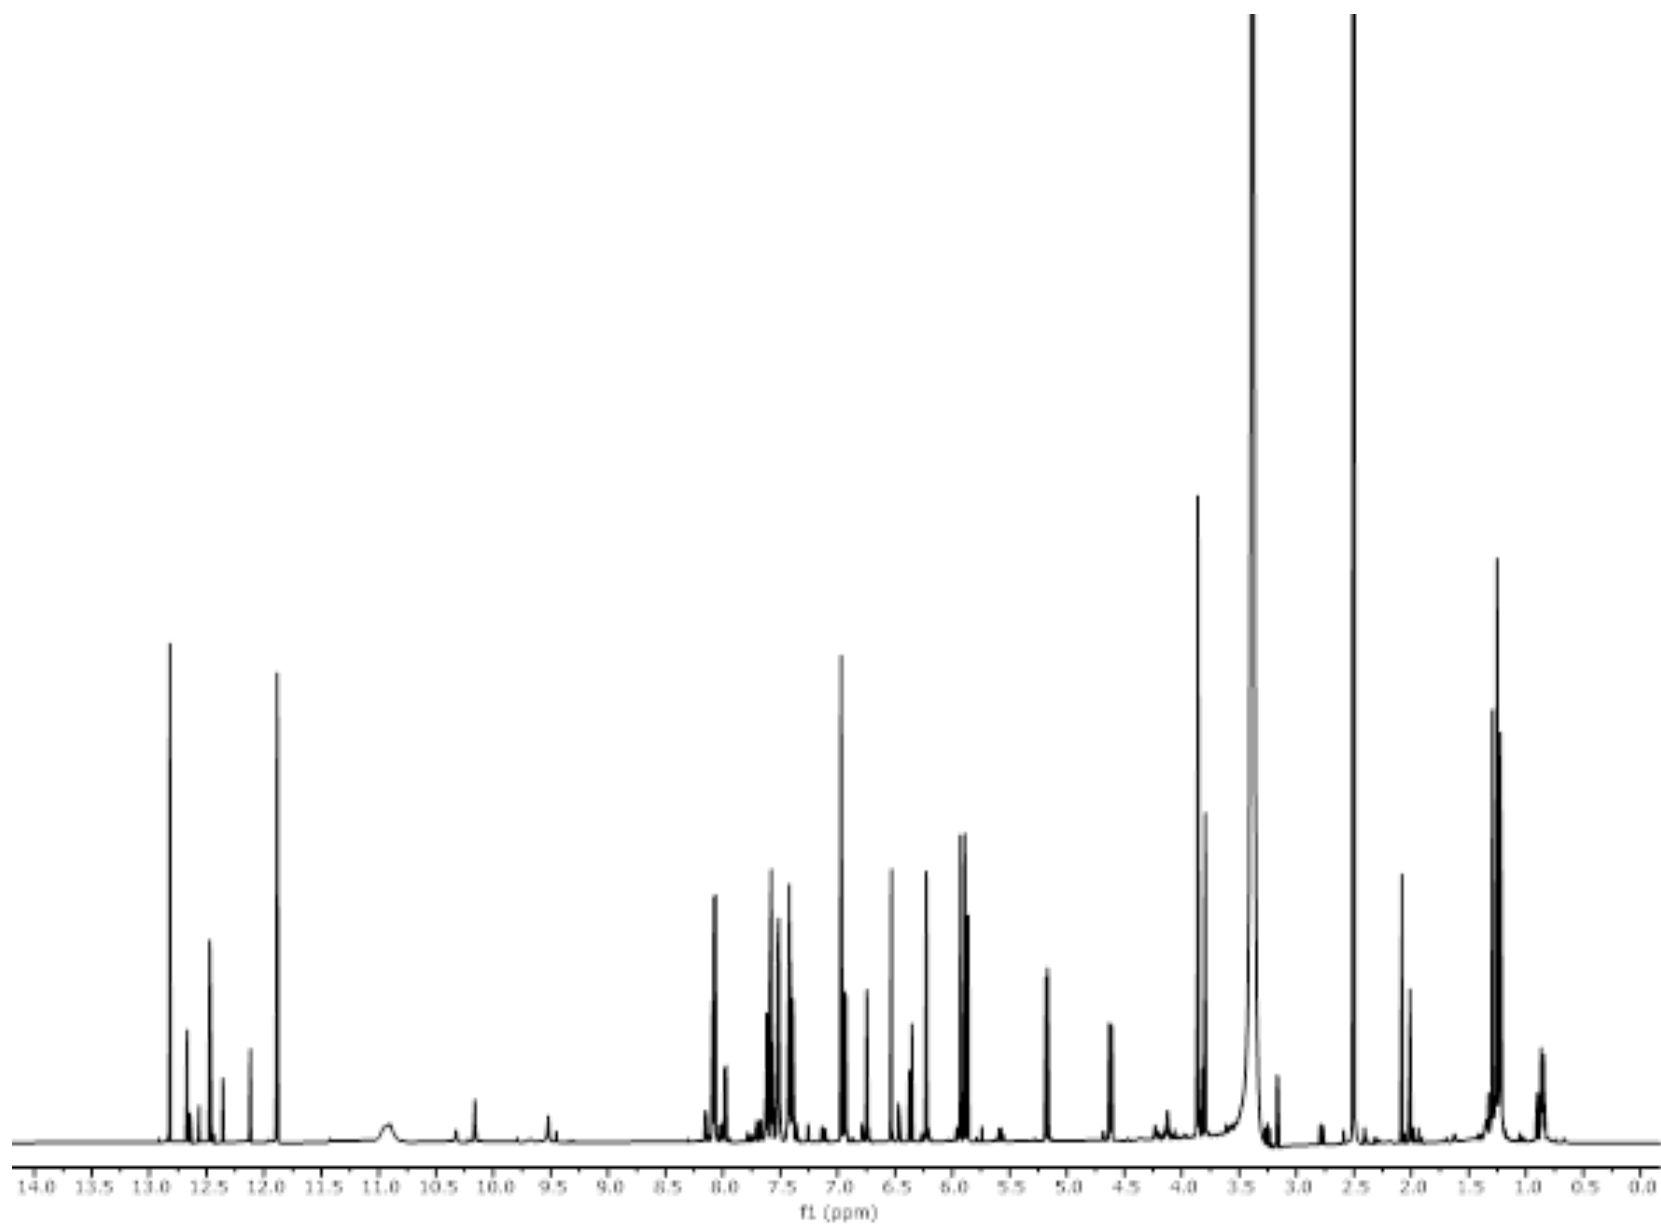

**Figure S8.**  $^1\text{H}$  NMR spectrum of F101 obtained from fractionation of the methanol extract of propolis (700 MHz, DMSO- $d_6$ ).

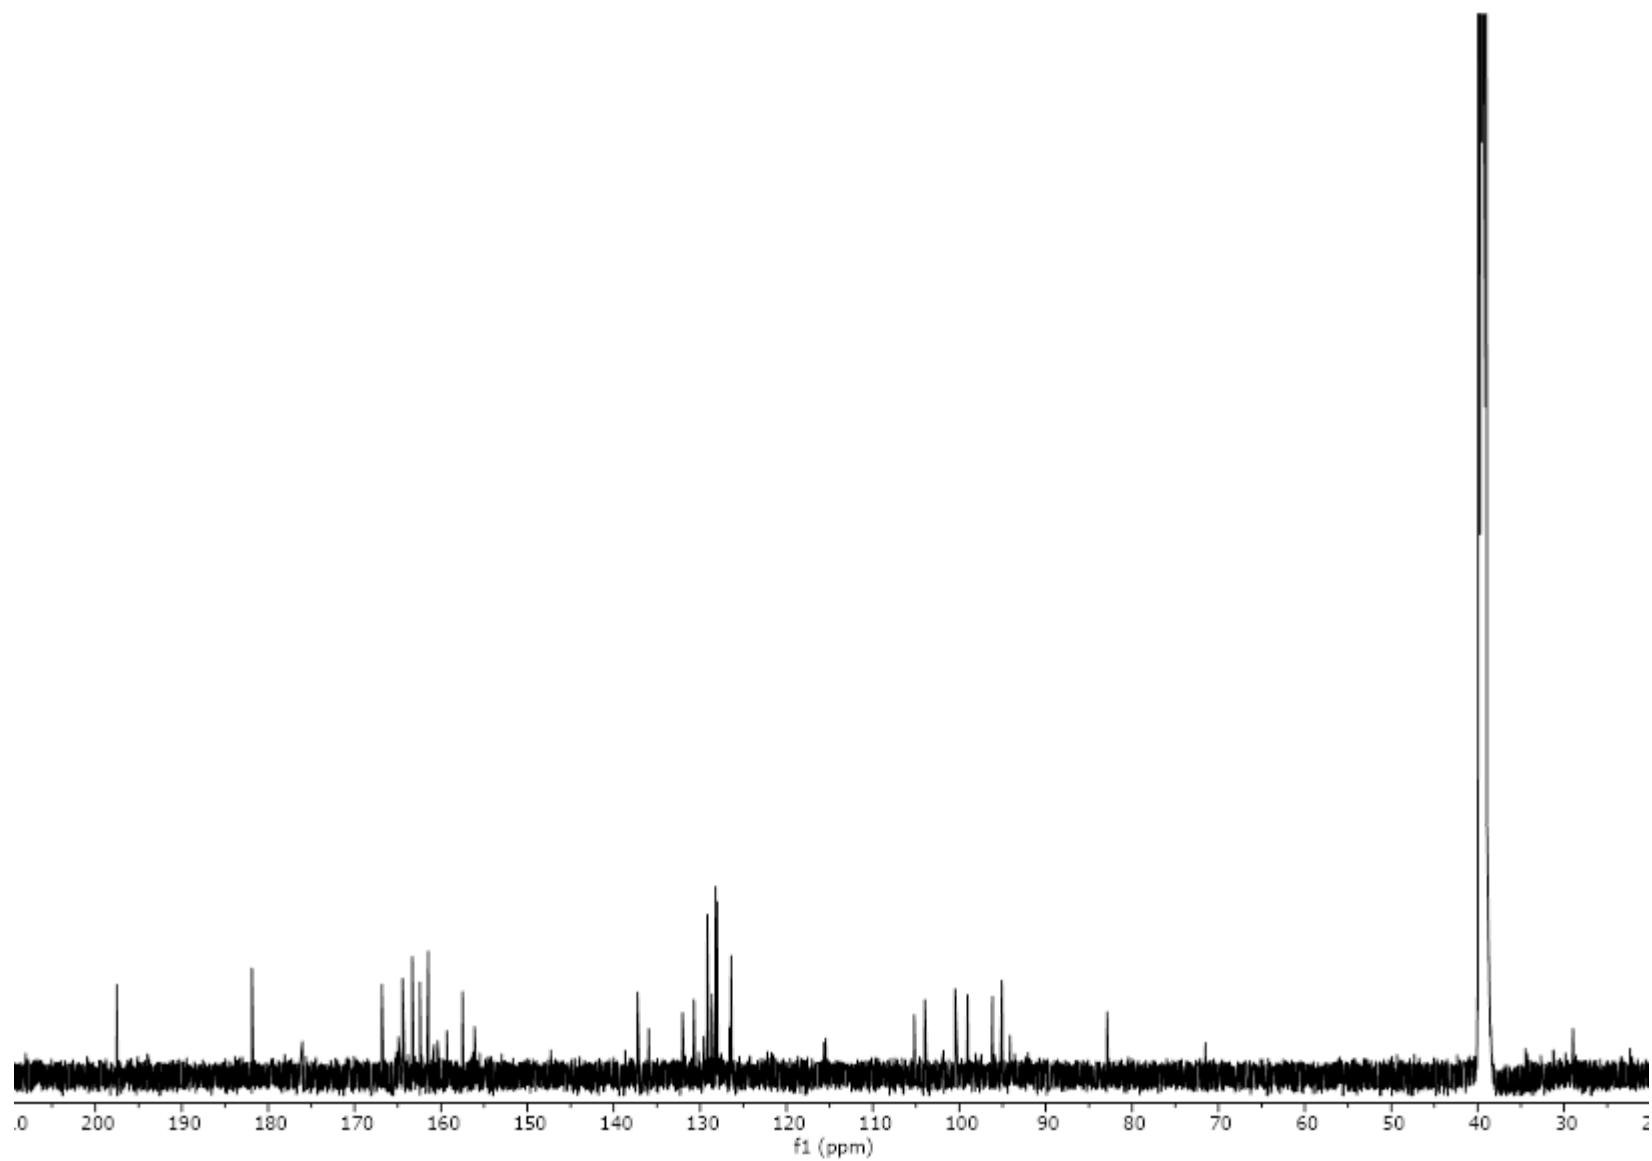

**Figure S9.**  $^{13}\text{C}$  NMR spectrum of F101 obtained from fractionation of the methanol extract of propolis (150 MHz, DMSO- $d_6$ ).

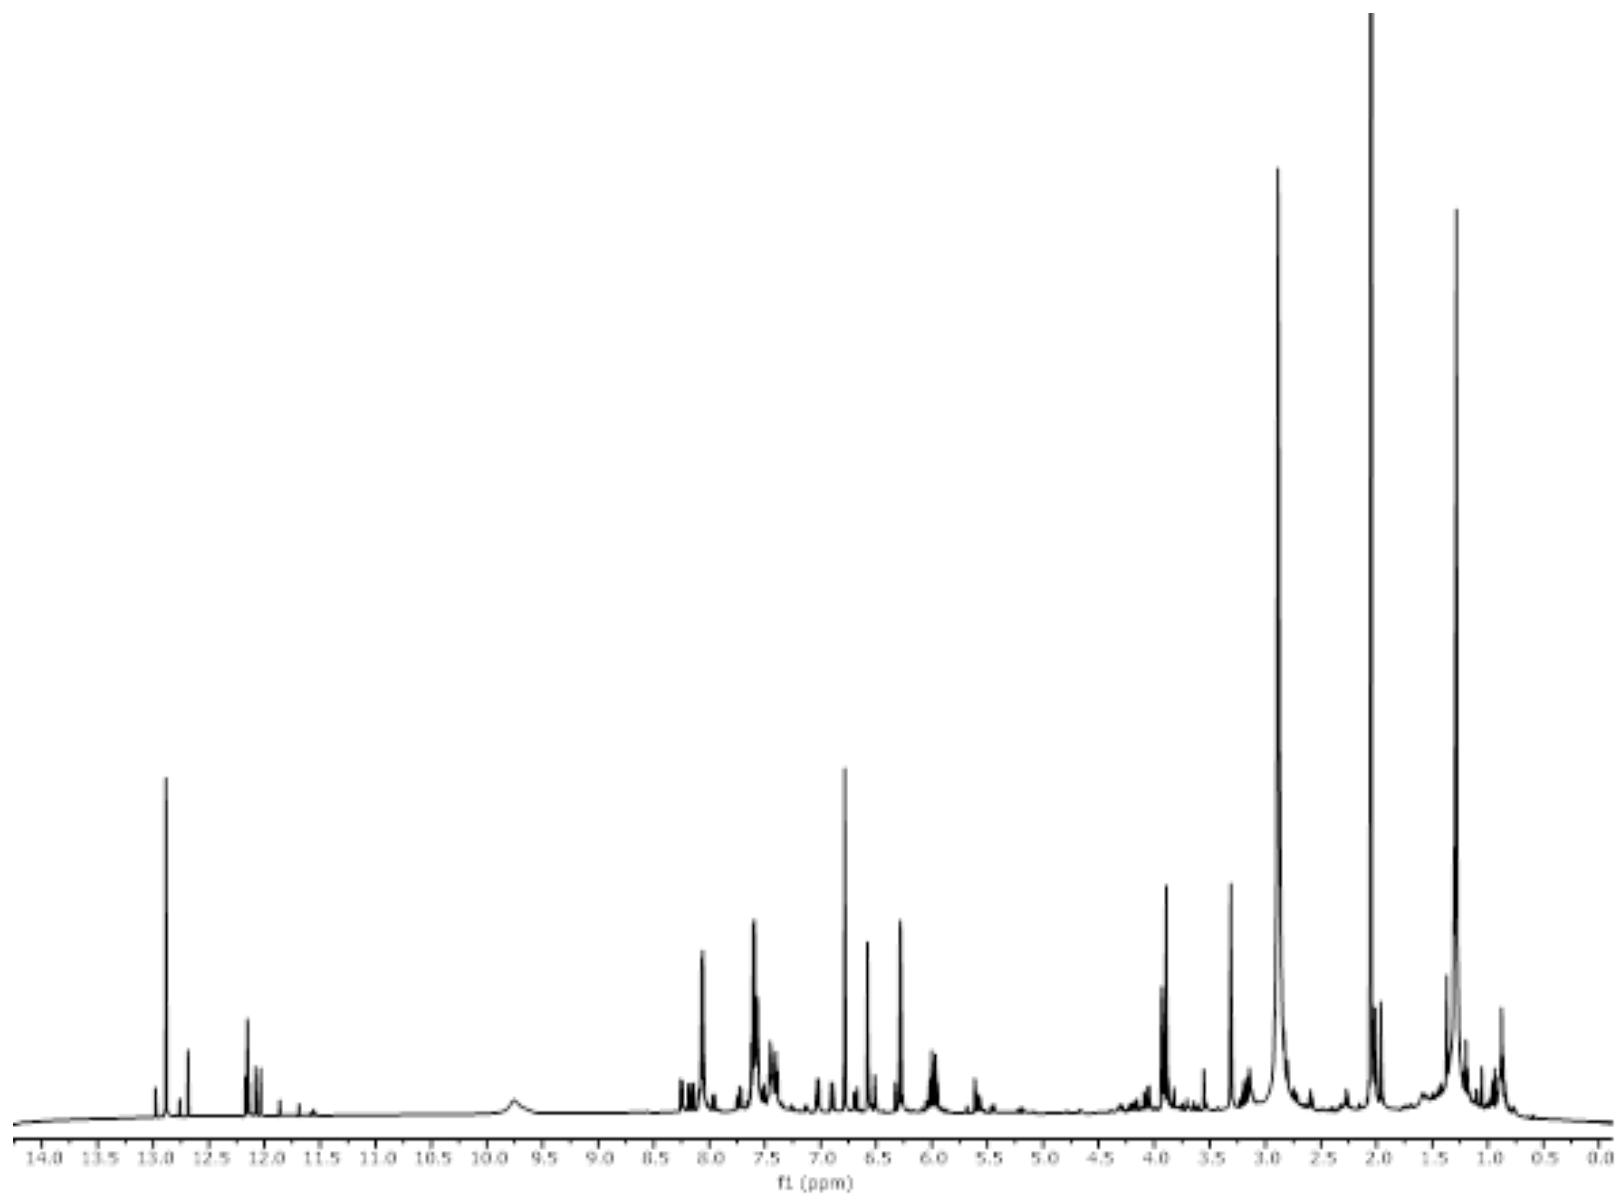

**Figure S10.**  $^1\text{H}$  NMR spectrum of F130 obtained from fractionation of the methanol extract of propolis (600 MHz, Acetone- $\text{d}_6$ ).

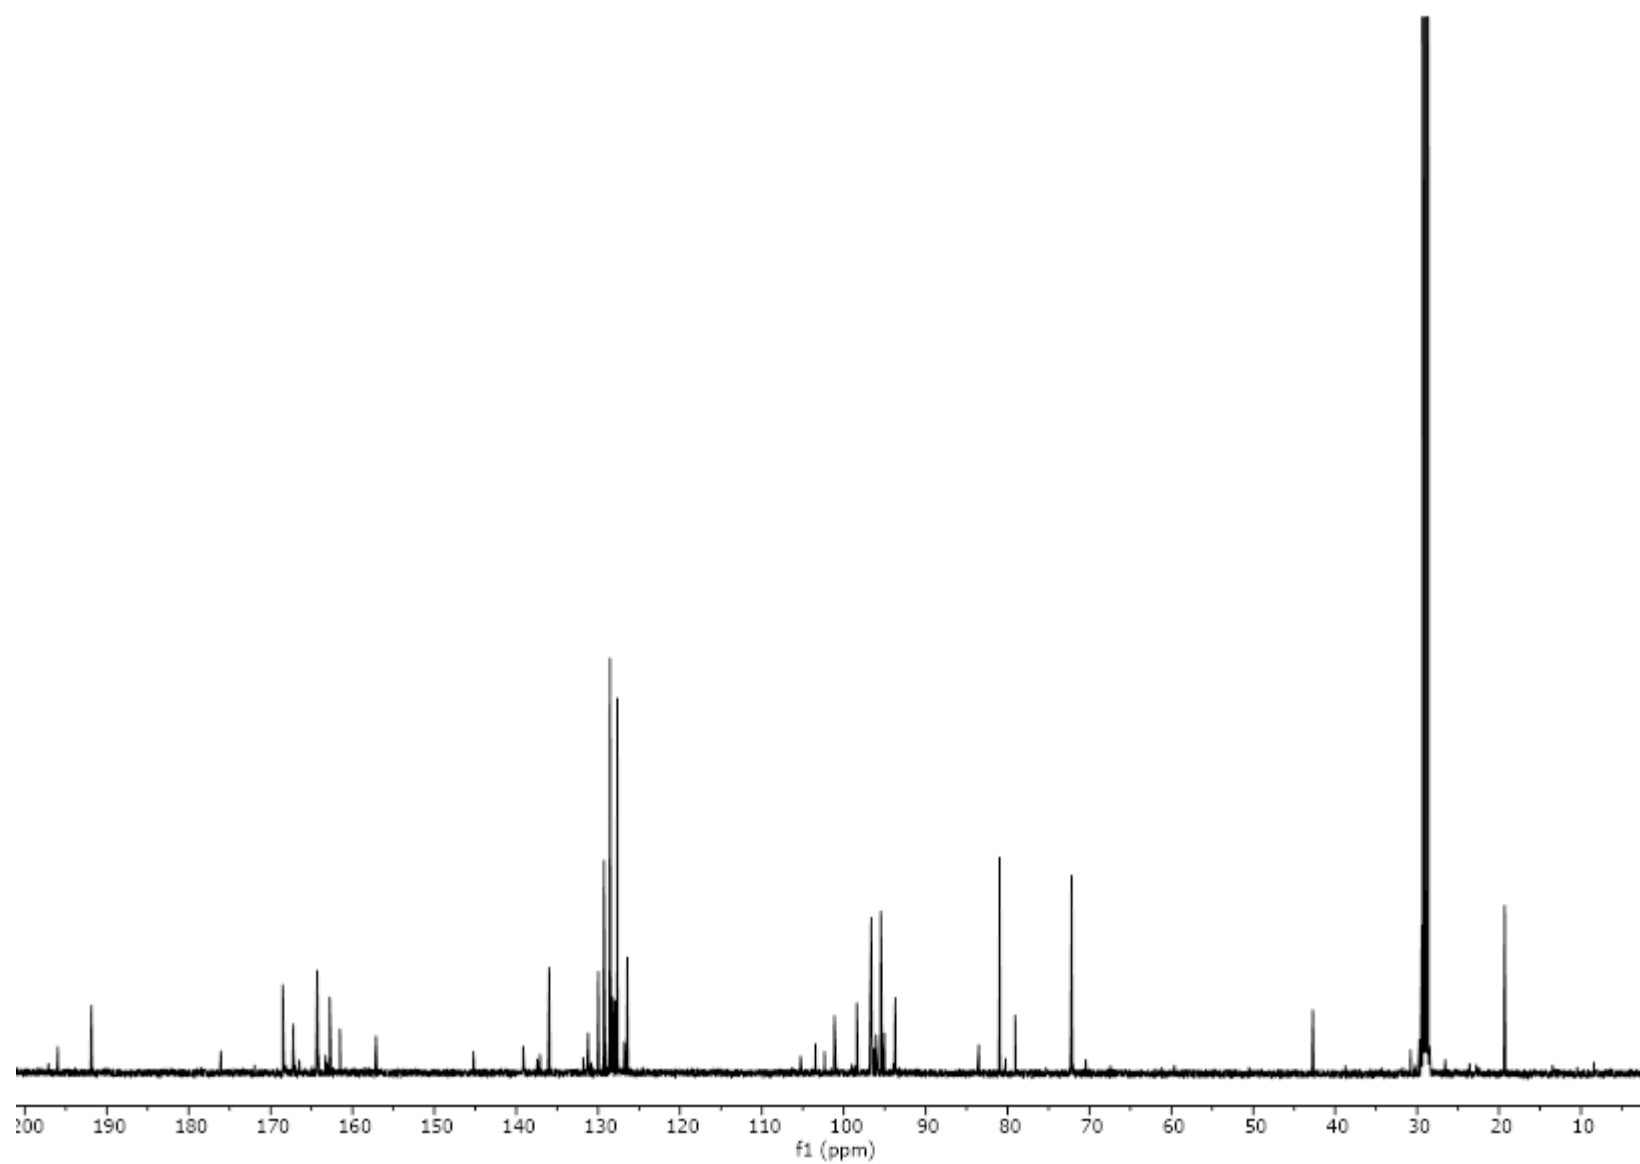

**Figure S11.**  $^{13}\text{C}$  NMR spectrum of F130 obtained from fractionation of the methanol extract of propolis (150 MHz, Acetone- $\text{d}_6$ ).

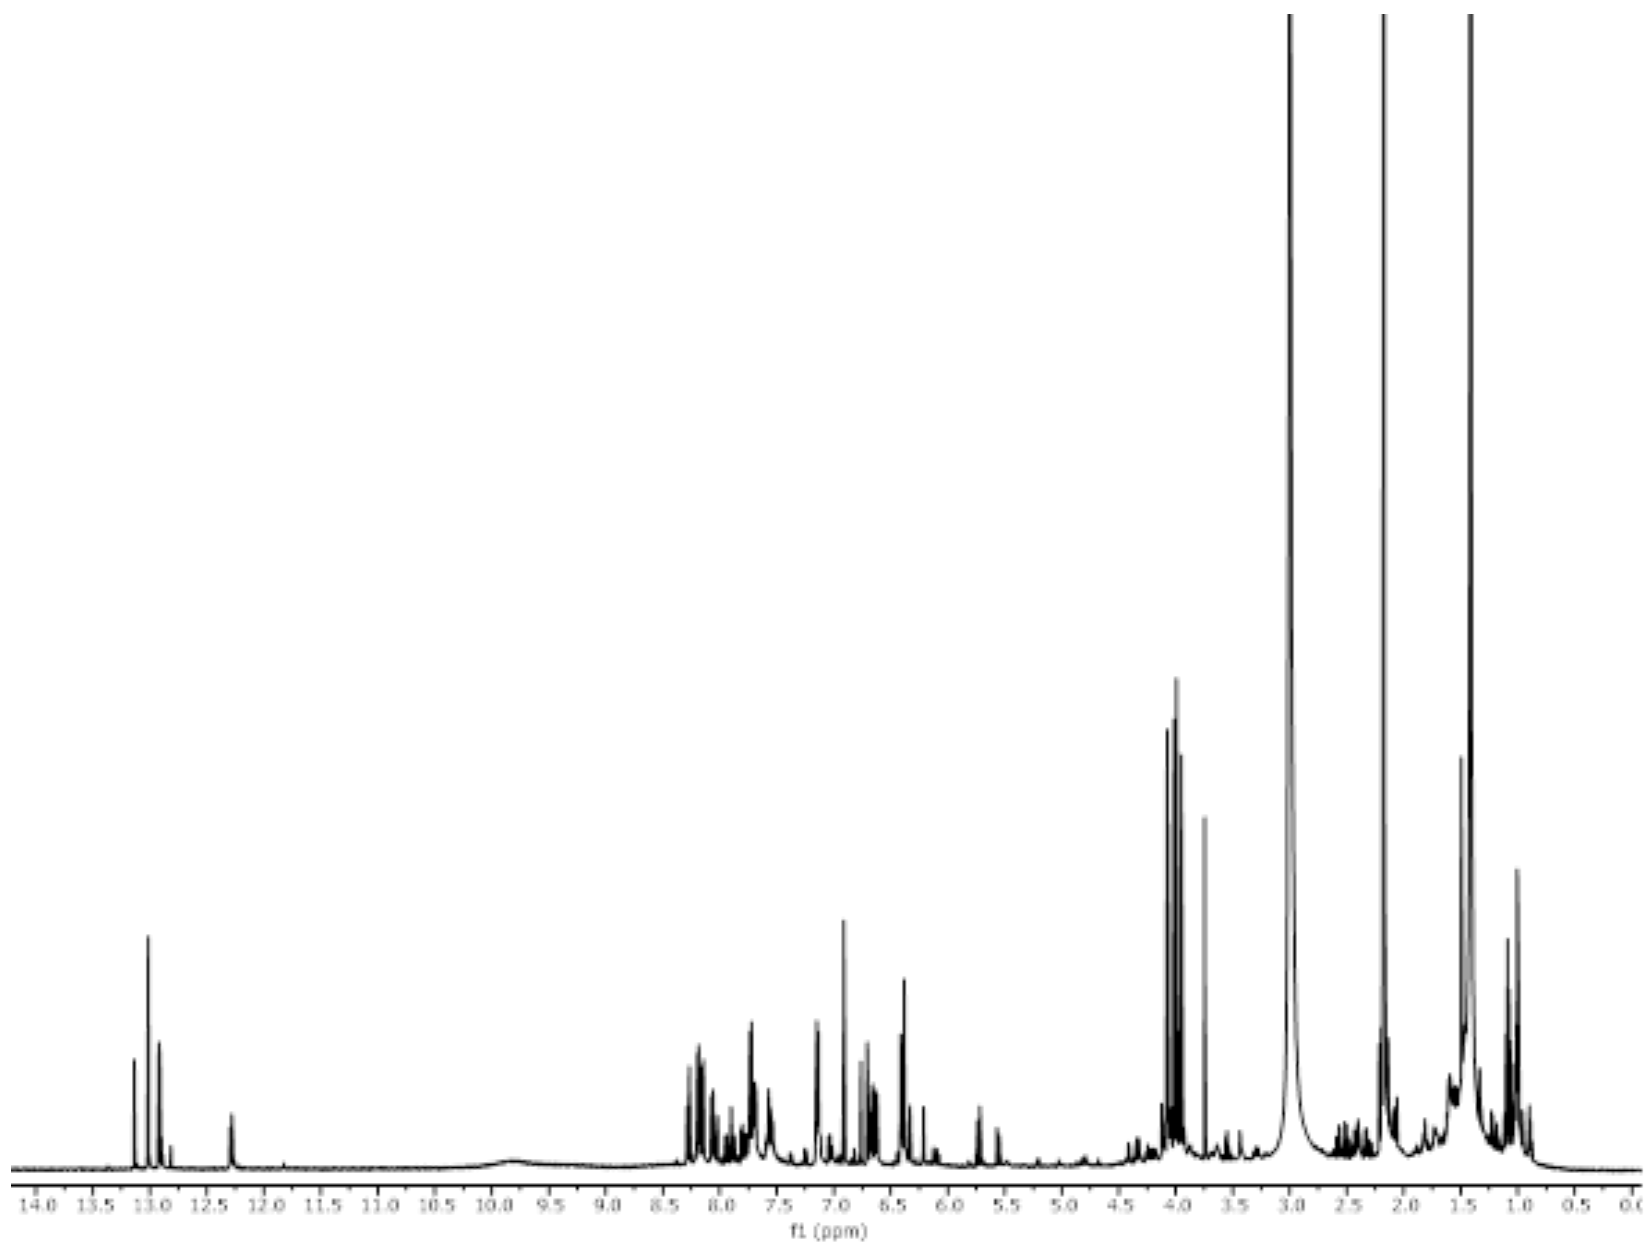

**Figure S12.**  $^1\text{H}$  NMR spectrum of F160 obtained from fractionation of the methanol extract of propolis (600 MHz, Acetone- $\text{d}_6$ ).

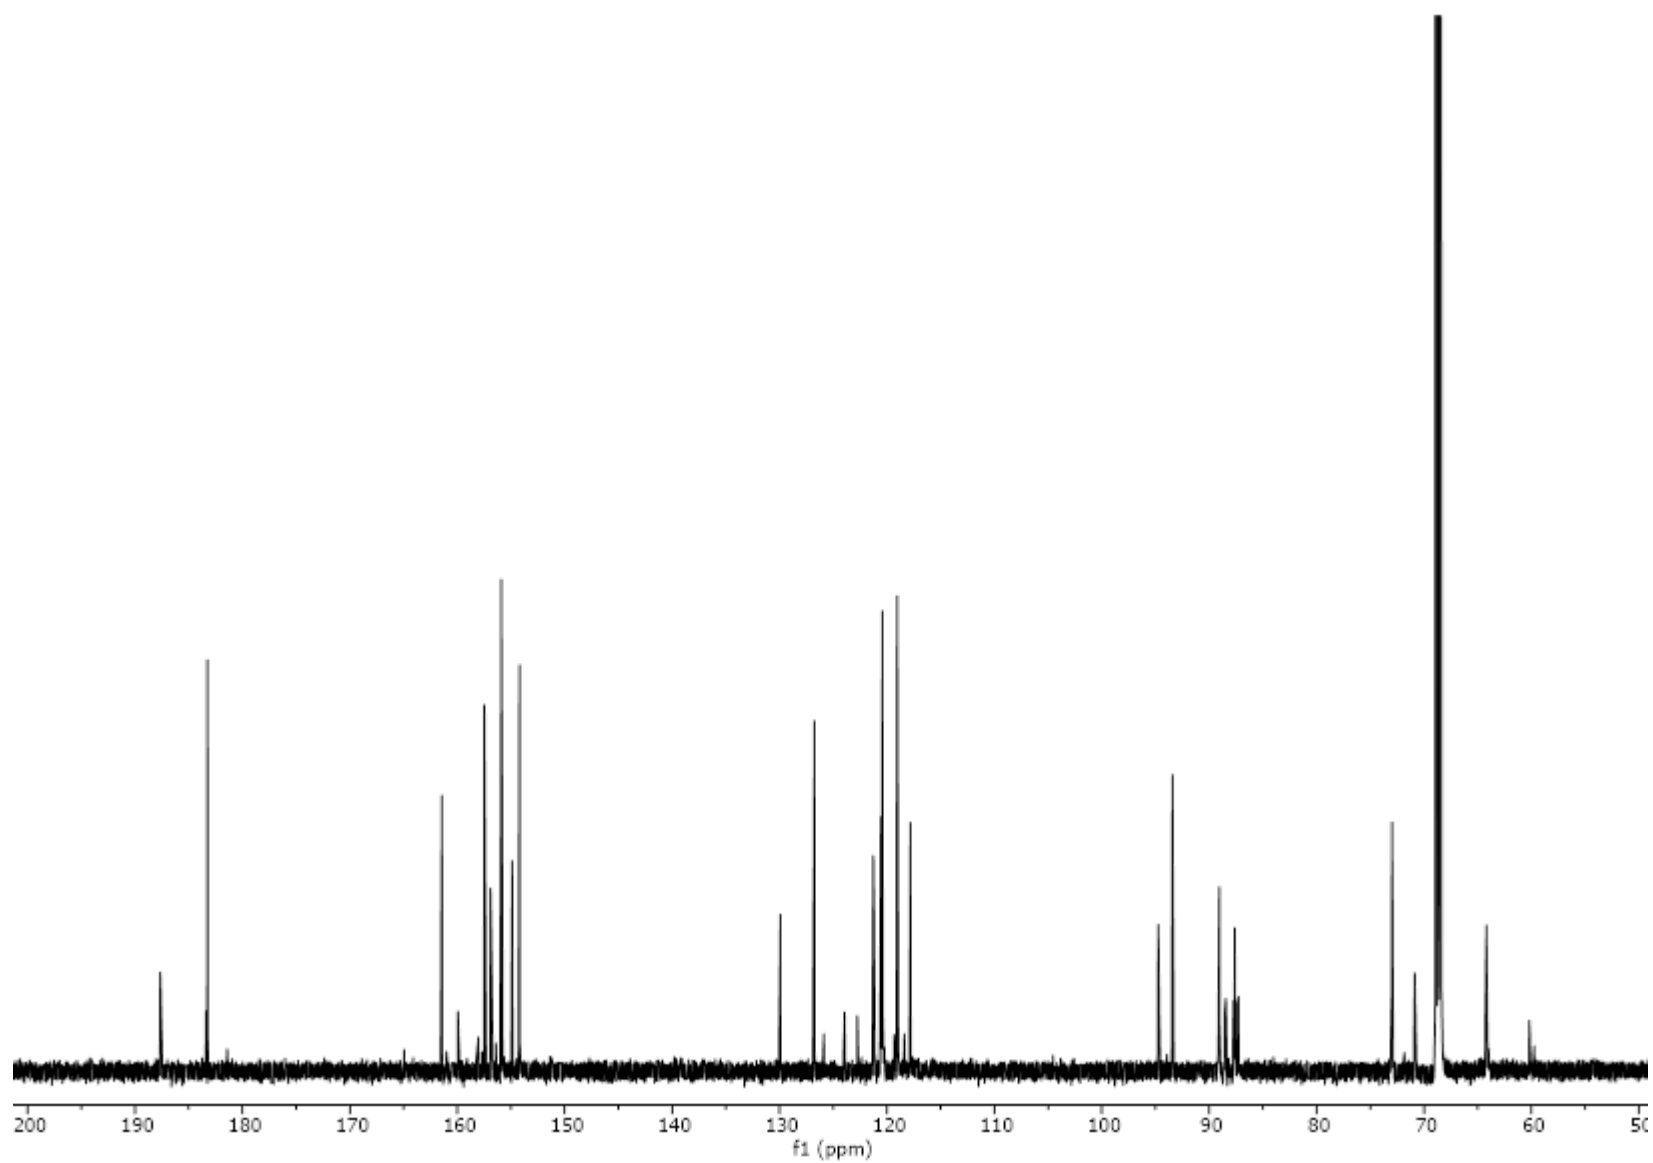

**Figure S13.**  $^{13}\text{C}$  NMR spectrum of F160 obtained from fractionation of the methanol extract of propolis (150 MHz, Acetone- $d_6$ ).

## Display Report

### Analysis Info

Analysis Name D:\Data\Elena Vargas\042822\_Propoleo\_Neg.d  
Method tune\_Low negative.m  
Sample Name 042822\_Propoleo\_Neg  
Comment

Acquisition Date 28/04/2022 12:25:45 p.m.

Operator Daniel Arrieta  
Instrument micrOTOF-Q 228888.10392

### Acquisition Parameter

|             |          |                       |           |                  |           |
|-------------|----------|-----------------------|-----------|------------------|-----------|
| Source Type | ESI      | Ion Polarity          | Negative  | Set Nebulizer    | 0.4 Bar   |
| Focus       | Active   | Set Capillary         | 3500 V    | Set Dry Heater   | 180 °C    |
| Scan Begin  | 50 m/z   | Set End Plate Offset  | -500 V    | Set Dry Gas      | 4.0 l/min |
| Scan End    | 3000 m/z | Set Collision Cell RF | 200.0 Vpp | Set Divert Valve | Source    |

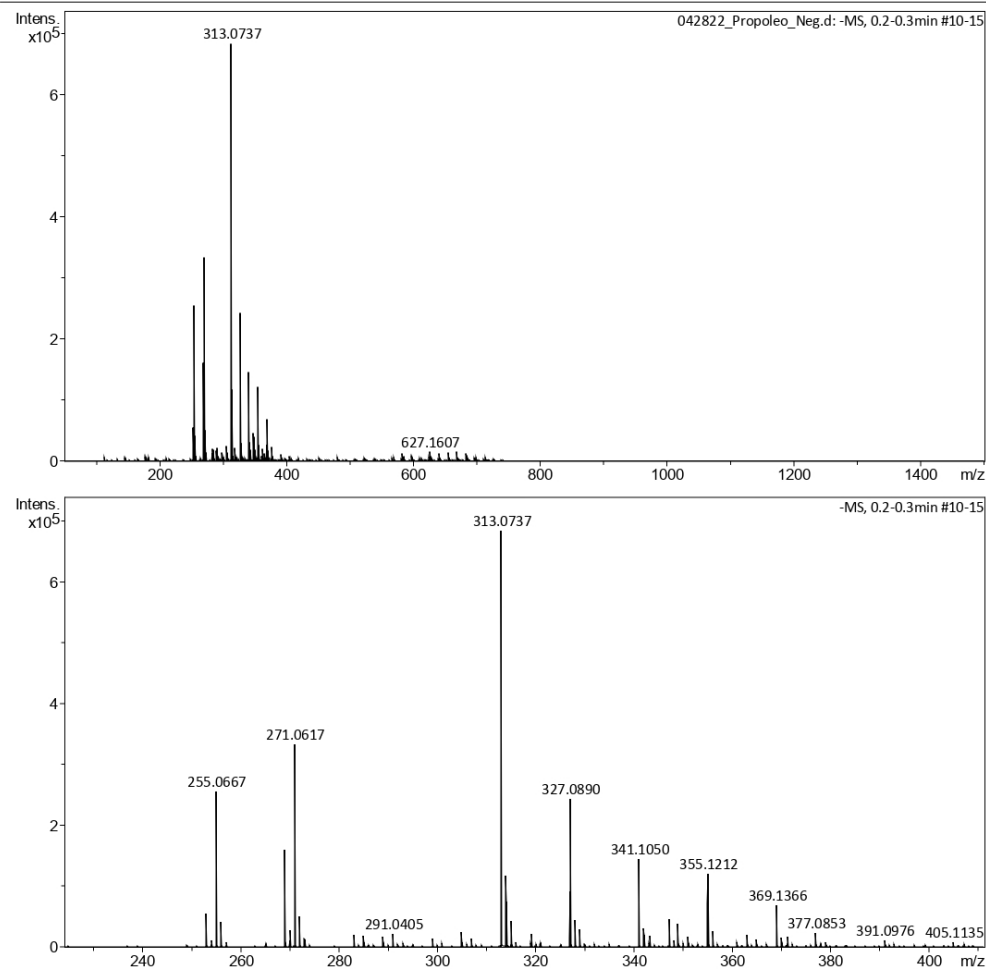

**Figure S14.** HRMS (ESI-negative mode) spectra of the methanol extract of propolis.

## Display Report

### Analysis Info

Analysis Name D:\Data\Elena Vargas\061722\_F40\_Neg.d  
Method tune\_Low negative.m  
Sample Name 061722\_F40\_Neg  
Comment

Acquisition Date 17/06/2022 04:20:46 p.m.

Operator Daniel Arrieta  
Instrument micrOTOF-Q 228888.10392

### Acquisition Parameter

|             |          |                       |           |                  |           |
|-------------|----------|-----------------------|-----------|------------------|-----------|
| Source Type | ESI      | Ion Polarity          | Negative  | Set Nebulizer    | 0.4 Bar   |
| Focus       | Active   | Set Capillary         | 3500 V    | Set Dry Heater   | 180 °C    |
| Scan Begin  | 50 m/z   | Set End Plate Offset  | -500 V    | Set Dry Gas      | 4.0 l/min |
| Scan End    | 3000 m/z | Set Collision Cell RF | 200.0 Vpp | Set Divert Valve | Source    |

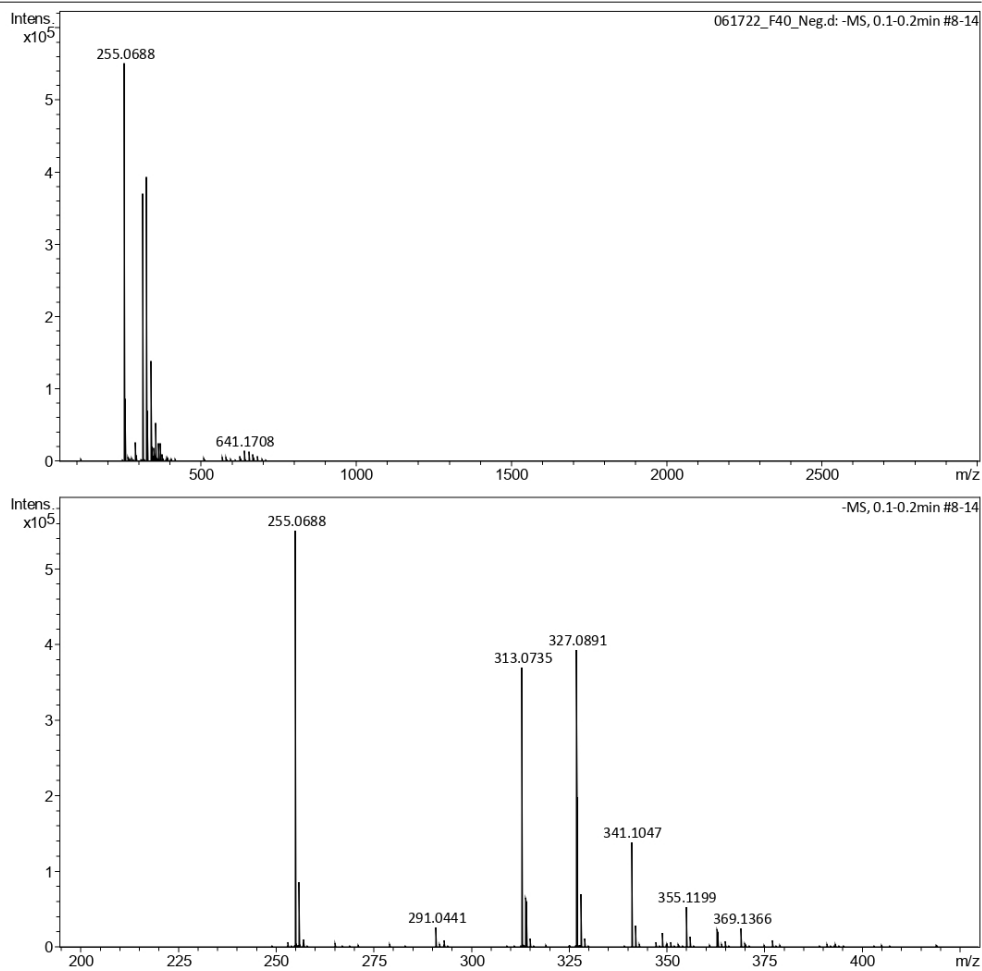

Figure S15. HRMS (ESI-negative mode) spectra of F40.



## Display Report

### Analysis Info

Analysis Name D:\Data\Elena Vargas\061722\_F80\_Neg.d  
Method tune\_Low negative.m  
Sample Name 061722\_F80\_Neg  
Comment

Acquisition Date 17/06/2022 04:29:21 p.m.

Operator Daniel Arrieta  
Instrument micrOTOF-Q 228888.10392

### Acquisition Parameter

|             |          |                       |           |                  |           |
|-------------|----------|-----------------------|-----------|------------------|-----------|
| Source Type | ESI      | Ion Polarity          | Negative  | Set Nebulizer    | 0.4 Bar   |
| Focus       | Active   | Set Capillary         | 3500 V    | Set Dry Heater   | 180 °C    |
| Scan Begin  | 50 m/z   | Set End Plate Offset  | -500 V    | Set Dry Gas      | 4.0 l/min |
| Scan End    | 3000 m/z | Set Collision Cell RF | 200.0 Vpp | Set Divert Valve | Source    |

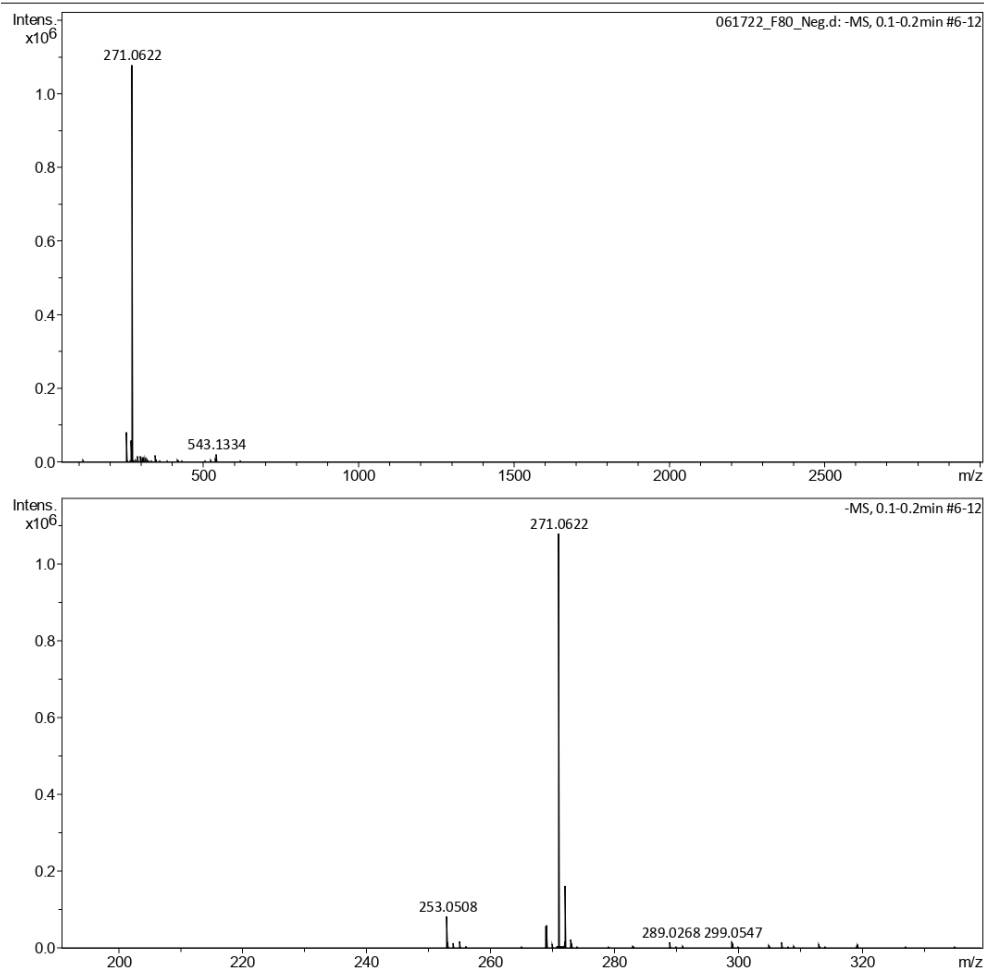

**Figure S16.** HRMS (ESI-negative mode) spectra of F80.

## Display Report

### Analysis Info

Analysis Name D:\Data\Elena Vargas\061722\_F101\_Neg.d  
Method tune\_Low negative.m  
Sample Name 061722\_F101\_Neg  
Comment

Acquisition Date 17/06/2022 04:32:53 p.m.

Operator Daniel Arrieta  
Instrument micrOTOF-Q 228888.10392

### Acquisition Parameter

|             |          |                       |           |                  |           |
|-------------|----------|-----------------------|-----------|------------------|-----------|
| Source Type | ESI      | Ion Polarity          | Negative  | Set Nebulizer    | 0.4 Bar   |
| Focus       | Active   | Set Capillary         | 3500 V    | Set Dry Heater   | 180 °C    |
| Scan Begin  | 50 m/z   | Set End Plate Offset  | -500 V    | Set Dry Gas      | 4.0 l/min |
| Scan End    | 3000 m/z | Set Collision Cell RF | 200.0 Vpp | Set Divert Valve | Source    |

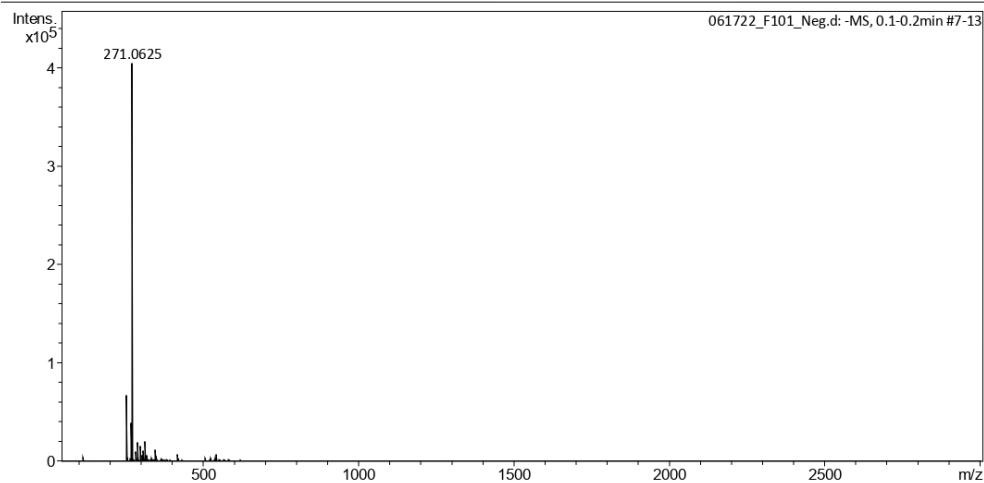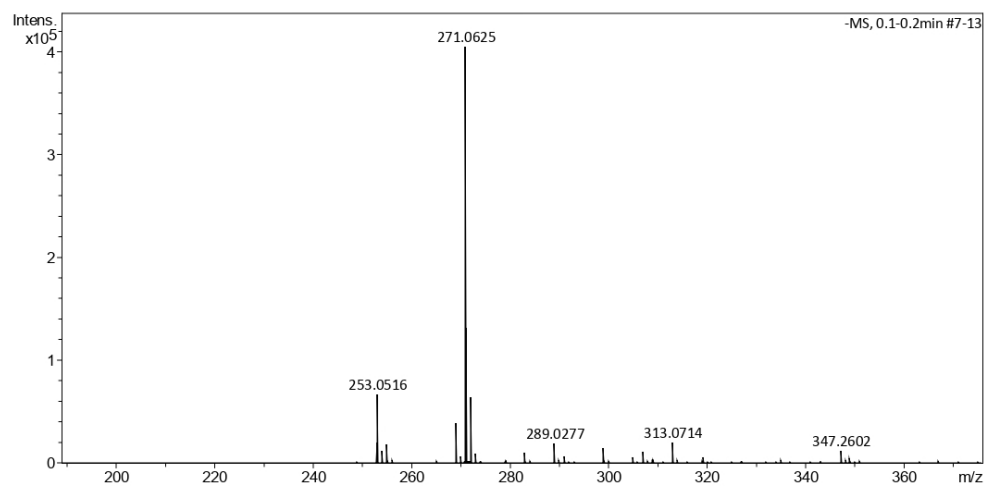

**Figure S17.** HRMS (ESI-negative mode) spectra of F101.

## Display Report

### Analysis Info

Analysis Name D:\Data\Elena Vargas\061722\_F130\_Neg.d  
Method tune\_Low negative.m  
Sample Name 061722\_F130\_Neg  
Comment

Acquisition Date 17/06/2022 04:36:55 p.m.

Operator Daniel Arrieta  
Instrument micrOTOF-Q 228888.10392

### Acquisition Parameter

|             |          |                       |           |                  |           |
|-------------|----------|-----------------------|-----------|------------------|-----------|
| Source Type | ESI      | Ion Polarity          | Negative  | Set Nebulizer    | 0.4 Bar   |
| Focus       | Active   | Set Capillary         | 3500 V    | Set Dry Heater   | 180 °C    |
| Scan Begin  | 50 m/z   | Set End Plate Offset  | -500 V    | Set Dry Gas      | 4.0 l/min |
| Scan End    | 3000 m/z | Set Collision Cell RF | 200.0 Vpp | Set Divert Valve | Source    |

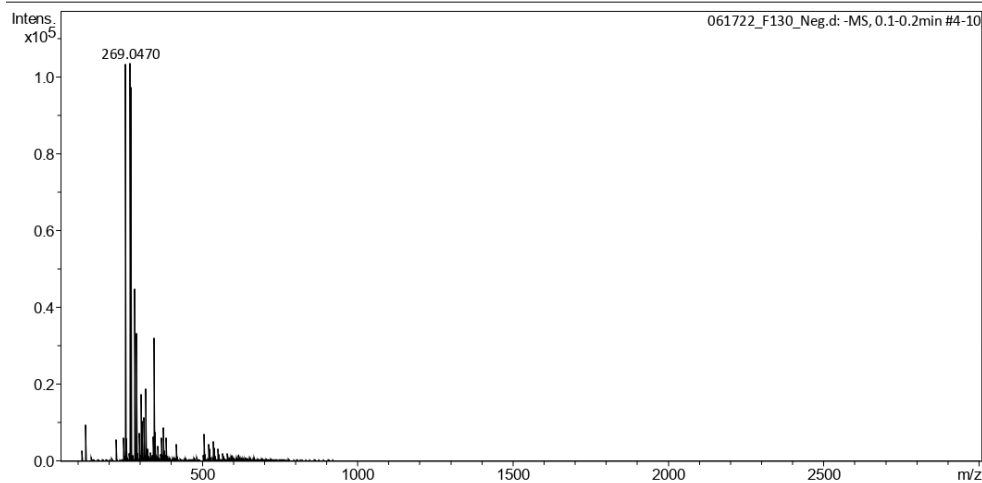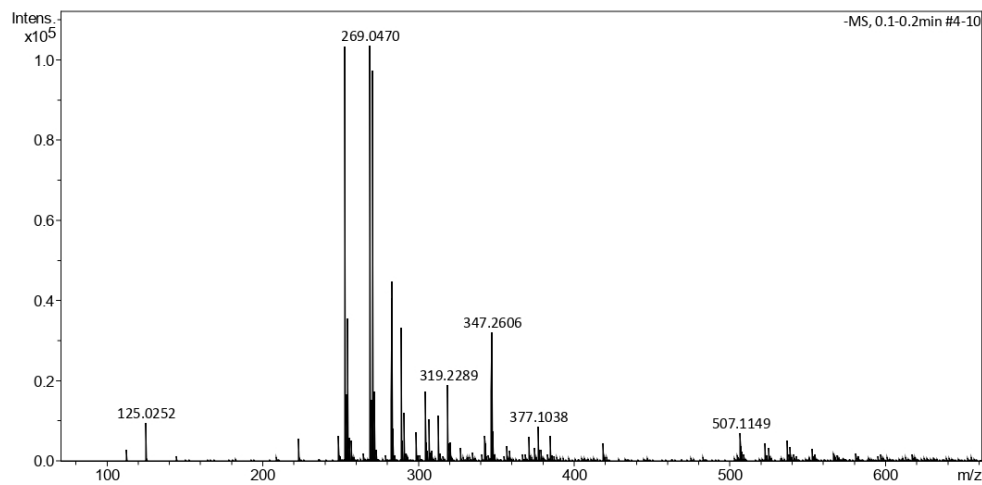

**Figure S18.** HRMS (ESI-negative mode) spectra of F130.

## Display Report

### Analysis Info

Analysis Name D:\Data\Elena Vargas\061722\_F160\_Neg.d  
Method tune\_Low negative.m  
Sample Name 061722\_F160\_Neg  
Comment

Acquisition Date 17/06/2022 04:40:28 p.m.

Operator Daniel Arrieta  
Instrument microTOF-Q 228888.10392

### Acquisition Parameter

|             |          |                       |           |                  |           |
|-------------|----------|-----------------------|-----------|------------------|-----------|
| Source Type | ESI      | Ion Polarity          | Negative  | Set Nebulizer    | 0.4 Bar   |
| Focus       | Active   | Set Capillary         | 3500 V    | Set Dry Heater   | 180 °C    |
| Scan Begin  | 50 m/z   | Set End Plate Offset  | -500 V    | Set Dry Gas      | 4.0 l/min |
| Scan End    | 3000 m/z | Set Collision Cell RF | 200.0 Vpp | Set Divert Valve | Source    |

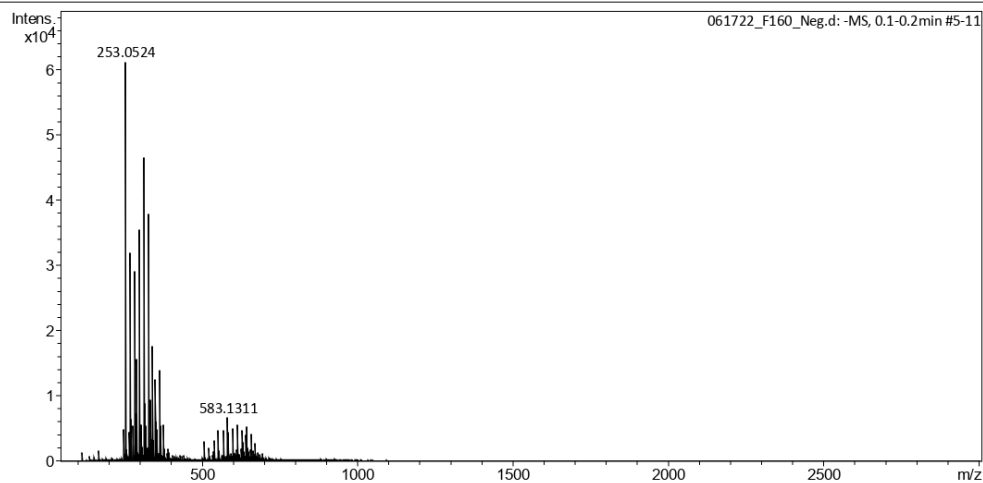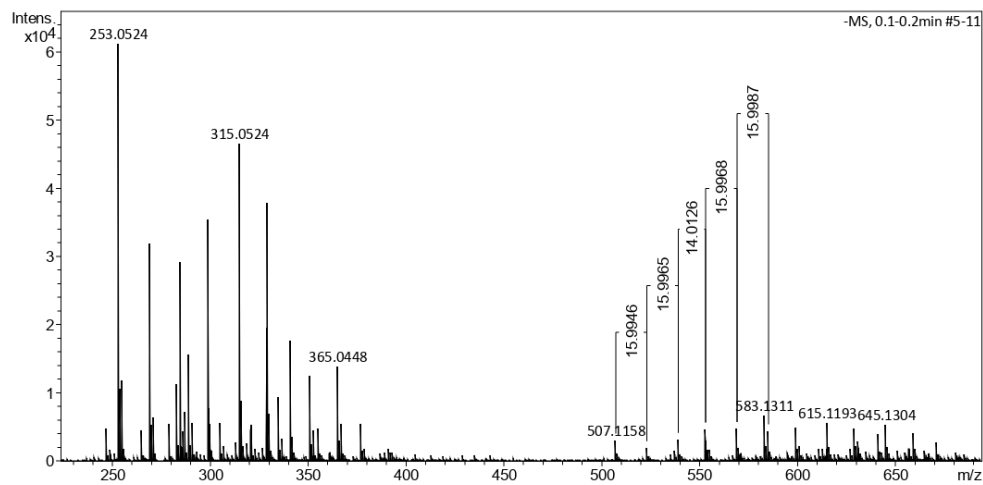

Figure S19. HRMS (ESI-negative mode) spectra of F160.
